# Supplementary material for: Distinct types of eigenvector localization in networks
Source: PubMed Central journal article supplement (PMC4709588; doi:10.1038/srep18847), 2016-01-12
Supplement: srep18847-s1.pdf [file srep18847-s1.pdf]

# Distinct types of eigenvector localization in networks: Supplemental Material

Romualdo Pastor-Satorras<sup>1</sup> and Claudio Castellano<sup>2,3</sup>

<sup>1</sup>Departament de Física i Enginyeria Nuclear, Universitat Politècnica de Catalunya, Campus Nord B4, 08034 Barcelona, Spain

<sup>2</sup>Istituto dei Sistemi Complessi (ISC-CNR), Via dei Taurini 19, I-00185 Roma, Italy

<sup>3</sup>Dipartimento di Fisica, “Sapienza” Università di Roma, P.le A. Moro 2, I-00185 Roma, Italy

# 1 Topological properties of the real networks considered

In Table SM-1 we present a summary of the basic statistical properties of the real networks analyzed in this paper (see Methods for a description). In Figure SM-1 we plot the corresponding degree distribution for each network. As we can see, all them have a long tailed degree distribution, with varying values of the degree exponent in a fit to a pure power-law form, ranging from 1.7 to 4.6 (see Table SM-1).

| Network  | $\gamma$ | $r$      | $q_{\max}$ | $K_M$ | $N_{K_M}$ |
|----------|----------|----------|------------|-------|-----------|
| HEP      | 1.8      | 0.63228  | 491        | 238   | 239       |
| Slashdot | 1.7      | -0.07383 | 2552       | 55    | 134       |
| Amazon   | 3.1      | -0.01765 | 2752       | 10    | 32886     |
| Internet | 2.2      | -0.19380 | 2337       | 17    | 34        |
| Email    | 1.9      | -0.11076 | 1383       | 43    | 275       |
| P2P      | 4.6      | -0.09256 | 95         | 6     | 1004      |
| Movies   | 1.8      | 0.20595  | 3789       | 359   | 1125      |
| WWW      | 2.6      | -0.05344 | 10721      | 155   | 1367      |
| PGP      | 2.0      | 0.23821  | 205        | 31    | 41        |

**Table SM-1:** Topological properties of the real networks considered:  $\gamma$  effective degree exponent in a fit of the degree distribution to the power-law form  $P(q) \sim q^{-\gamma}$ ;  $r$  Pearson degree correlation coefficient, measuring degree correlations [1];  $q_{\max}$  maximum degree;  $K_M$  maximum  $K$ -core index;  $N_{K_M}$  size of the maximum  $K$ -core [2].

Real networks show different levels of degree correlations as measured from the average degree of the nearest neighbors of the vertices of degree  $q$ ,  $q_{\text{nn}}(q)$  [3](see Figure SM-2) and the Pearson degree correlation  $r$  [1](see Table SM-1).

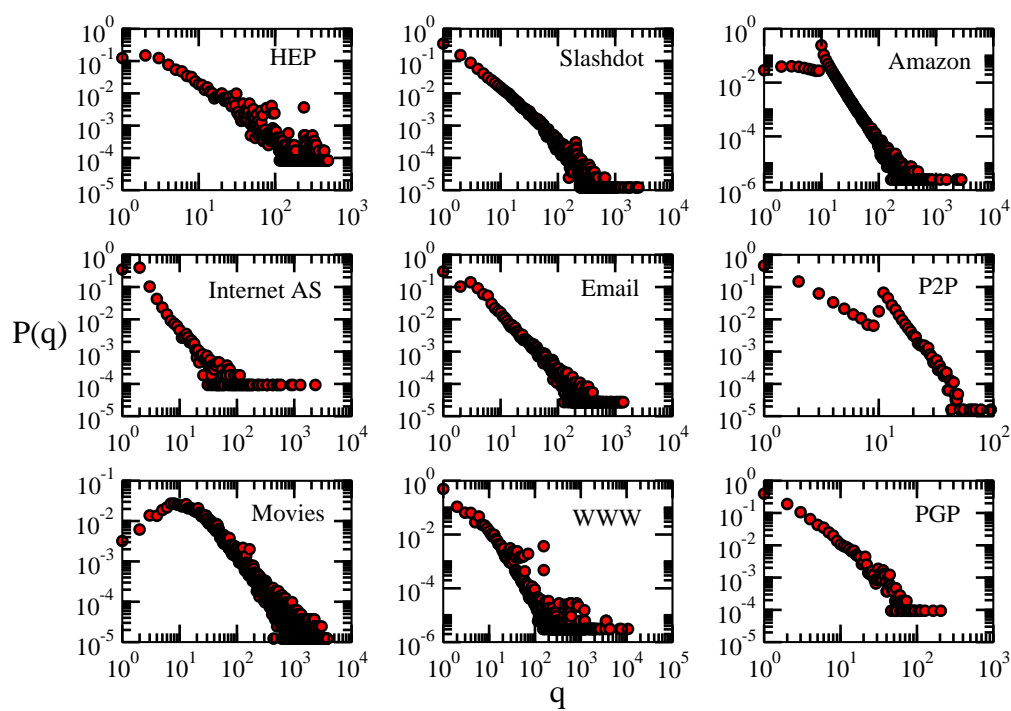

**Figure SM-1:** Degree distribution of the real networks considered.

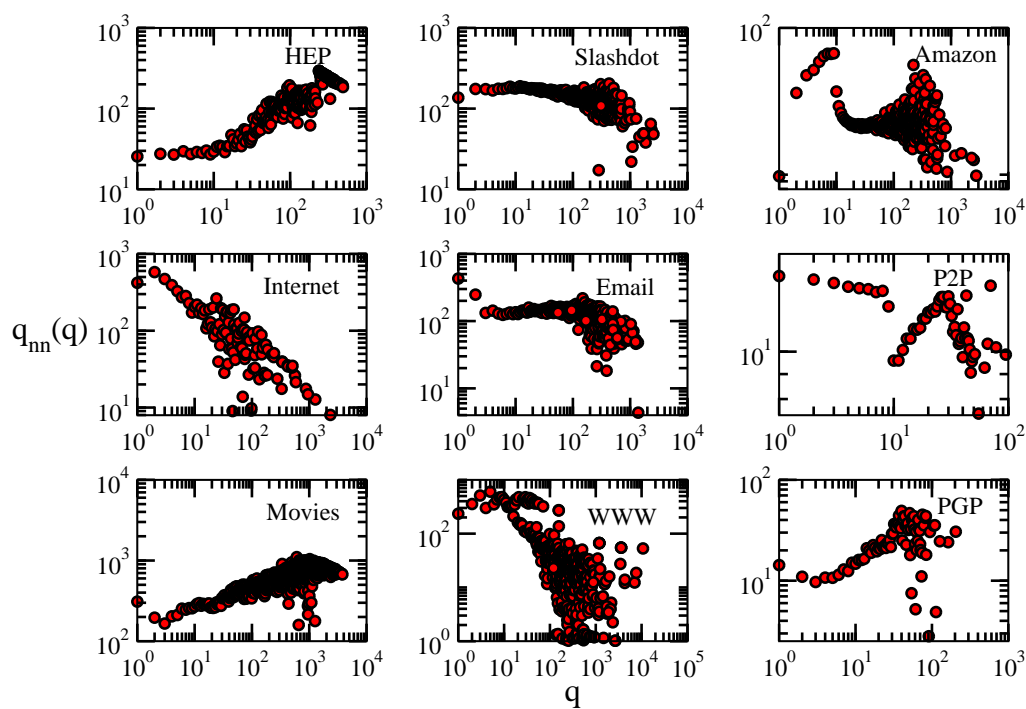

**Figure SM-2:** Average degree of the nearest neighbors as a function of the degree  $q$  of the real networks considered.

## Supplementary Figures

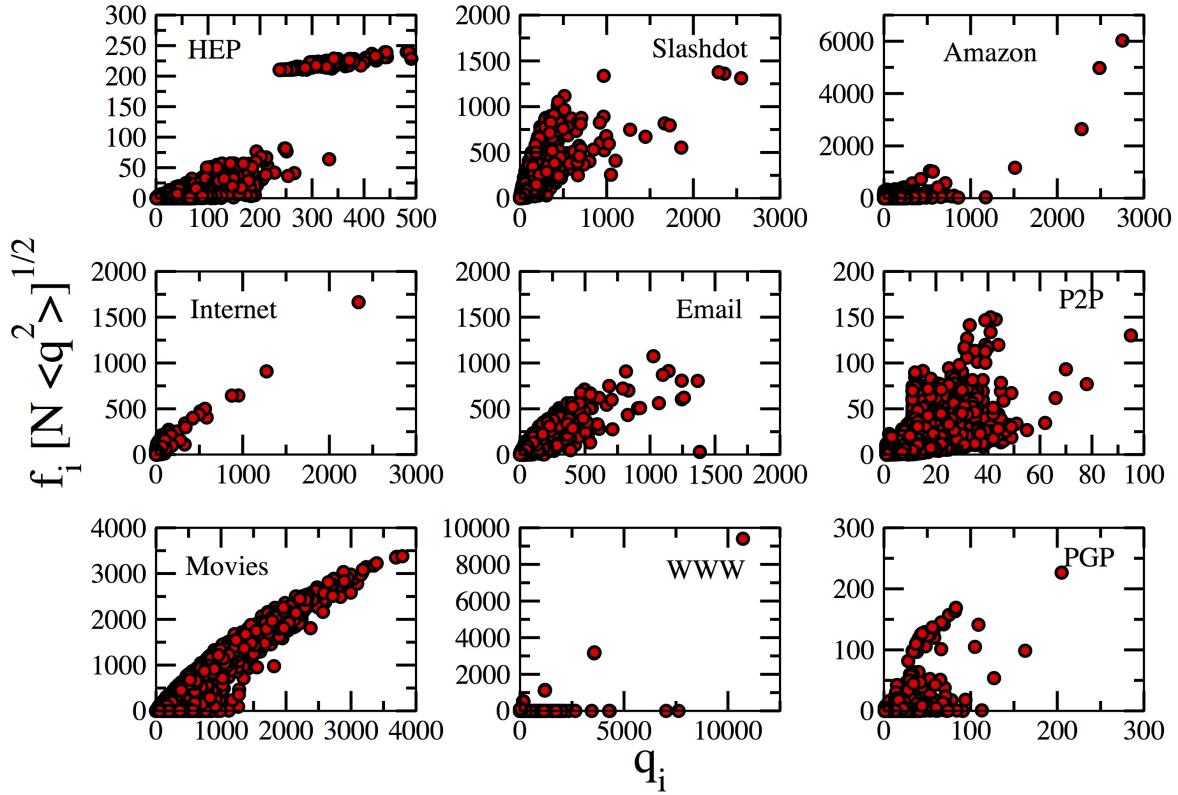

**Figure SF-1:** Rescaled scatter plot of  $f_i [N \langle q^2 \rangle]^{1/2}$  as a function of  $q_i$  for real-world networks.

## References

- [1] Newman, M. E. J. Assortative mixing in networks. *Phys. Rev. Lett.* **89**, 208701 (2002).
- [2] Seidman, S. B. Network structure and minimum degree. *Social Networks* **5**, 269–287 (1983).
- [3] Pastor-Satorras, R., Vázquez, A. & Vespignani, A. Dynamical and correlation properties of the Internet. *Phys. Rev. Lett.* **87**, 258701 (2001).
